# Supplementary material for: Interplay of electrohydrodynamic structure formation and microphase alignment in lamellar block copolymers
Source: Royal Society of Chemistry journal article supplement (doi:10.1039/c2sm00010e), 2012-01-01
Supplement: c2sm00010e.pdf [file c2sm00010e.pdf]

## Interplay of Electrohydrodynamic Structure Formation and Microphase Alignment in Lamellar Block Copolymers — Supplementary Information

Yuan Zhou,<sup>1,2</sup> Alexandre Nicolas,<sup>1,\*</sup> Katherine R. Thomas,<sup>3</sup> and Ullrich Steiner<sup>1,†</sup>

<sup>1</sup>*Cavendish Laboratory, University of Cambridge, Cambridge CB3 0HE, UK*

<sup>2</sup>*East China University of Science and Technology,  
 130 Meilong Road, Shanghai 200237, P. R. China*

<sup>3</sup>*Max-Planck Institute for Dynamics and Self-Organization, 37073 Göttingen, Germany*

(Dated: February 7, 2012)

We discuss the stability of a toroidal undulation in terms of the free energy difference for a ring-array of isolated drops with respect to a toroidal rim

$$\Delta G_{tot} = \Delta G_{\gamma} + \Delta G_E + \Delta G_I. \quad (1)$$

The first term is the surface tension contribution  $G_{\gamma}$ . A toroidal undulation tends to break up into smaller isolated volumes with the same overall volume  $V$  but with a reduced polymer-air surface area  $A$ , driven by the surface tension  $\gamma_{PS}$ . A toroidal undulation is formed by the nucleation of a central column in a film with initial thickness  $z_0$ , with a modulation amplitude  $\delta$ , wave vector  $q$  (i.e. wavelength  $\lambda = 2\pi/q$ ) at the radius  $r = k\lambda$  ( $k = 0, 1, 2, \dots$ ). Assuming a sinusoidal modulation in the cylindrical coordinates, the local film height is

$$z = z_0 + \delta \cos(qr). \quad (2)$$

The surface free energy per volume of the toroid is

$$G_{\gamma} = \gamma_{PS} \frac{A}{V} = \gamma_{PS} \iint r d\theta ds / \iiint r d\theta dr dz. \quad (3)$$

Since  $\lambda$  is the intrinsic wavelength of the instability, we assume that the secondary instability along the torus decays with the same mode. This gives rise to  $2\pi r \approx 6m\lambda$  ( $m = 0, 1, 2, \dots$ ), which is in line with previous experimental results [1].  $\Delta G_{\gamma}$  arises from the difference in  $A$  of the two conformations (toroid *vs.* isolated volumes).

The second term in Eq. (1) is the electrostatic energy contribution. For simplicity, we consider a homogeneous layered system subjected to a fixed voltage, i.e. at very early and very late stages of the instability. The electric field energy per volume is

$$G_E = -\frac{1}{2} C_{vol} U^2, \quad (4)$$

where  $U$  is the voltage applied,  $C_{vol}$  is the per volume capacitance, which depends on (1) the polymer/air arrangement within the capacitor gap and (2) the alignment of the block-copolymer morphology within respect

to the field lines. The minus sign stems from the orientation dependence of the depolarization field, which results from the surface charges of a dielectric body in an electric field.

For an initial homopolymer/air double-layer with film thickness  $h$ , dielectric constant  $\epsilon_p$ , air layer thickness  $d-h$ , and dielectric constant  $\epsilon_{air}$ , the capacitance per volume of a capacitor with area  $A$  is given by the capacitances of the two individual layers in series

$$C_{vol} = \frac{1}{V} \left( \frac{h}{\epsilon_0 \epsilon_p A} + \frac{d-h}{\epsilon_0 \epsilon_{air} A} \right)^{-1}, \quad (5)$$

with  $\epsilon_0$  the vacuum permittivity. The instability proceeds to form plugs spanning the two electrodes (spaced at a distance  $d$ ), covering an area  $A_p$ . The capacitance is then calculated by the a parallel configuration of air and polymer filled capacitors

$$C_{vol} = \frac{1}{V} \left( \frac{\epsilon_0 \epsilon_p A_p}{d} + \frac{\epsilon_0 \epsilon_{air} (A - A_p)}{d} \right). \quad (6)$$

EHD instabilities of BCP films and the break-up of BCP containing structures are more complex because the alignment of the BCP lamellae with repeat to the electric field lines gives rise to additional capacitance terms. Since spin-cast PS-*b*-PMMA films are typically not (or only partially) micro-phase separated, the average of the PS and PMMA dielectric constants was used. This is electrostatically identical the effective dielectric constant of the final, electrode-spanning state of the BCP, where the lamellae are aligned along the electric field lines. The expression  $\epsilon_p = (\epsilon_{PS} + \epsilon_{PMMA})/2$  was therefore used for both the initial and final expressions of  $G_E$ .

The third term in Eq. (1) arises from the internal energy of the micro-phase-separated block copolymer melt. It has two contributions,  $G_I = G_{\gamma I} + G_{el}$ , quantifying the balance between interfacial energy of the two polymer blocks and the elastic energy of deforming the lamellar stack, respectively [2]. Here, we use an Alexander-de Gennes type scaling relationship for the change in BCP internal energy arising from a deformation of the lamellar microphase morphology [3–6]. Per unit volume

$$G_{\gamma I} = 2 \frac{\gamma I}{D} \quad (7)$$

\*Now at: Laboratoire Interdisciplinaire de Physique, Université Joseph Fourier, 140 rue de la Physique Domaine Universitaire, BP 87 38402 Saint Martin d'Hères cedex, France

†Electronic address: u.steiner@phy.cam.ac.uk

and

$$G_{\text{el}} = \frac{3 k_B T}{2 N \nu} \sum_i \left[ \left( \frac{D_i}{D_{i,0}} \right)^2 + \left( \frac{D_{i,0}}{D_i} \right)^2 - 2 \right]$$

$$= 3 \frac{k_B T}{N \nu} \left( \frac{D^2}{2 N a^2} + \frac{2 N a^2}{D^2} - 2 \right), \quad (8)$$

where  $\gamma_I$  is the PS-PMMA interfacial tension and  $D$  is lamellar spacing consisting of the sum of PS and PMMA lamellar thicknesses,  $D_{\text{PS}}$  and  $D_{\text{PMMA}}$ , respectively (parameterized by the index  $i$ ). For BCPs with symmetric blocks,  $D_{\text{PS}} = D_{\text{PMMA}} = D/2$ .  $D_{i,0}$  refers to the equilibrated, undeformed chains with Gaussian end-to-end distances  $D_{i,0} = a\sqrt{N}/2$ .  $N$  is the total degree of polymerisation of the BCP ( $N_{\text{PS}} \approx N_{\text{PMMA}} \approx N/2$ ) and

$a \approx a_{\text{PS}} \approx a_{\text{PMMA}}$  is the Kuhn segment length.  $N\nu$  is the volume of a BCP coil, with  $\nu$  the monomer volume. For our system,  $a = 0.52 \pm 0.05$  nm and  $\nu \approx 100 \text{ \AA}^3$  [7].  $k_B$  is Boltzmann's constant and  $T$  is the temperature.

The internal energy difference was calculated by comparing the lamellar spacing in different confinement situations. In our case, the average lamellar spacing in the innermost columns ( $R_0$ ) is as high as  $1.47D_{\text{eq}}$ , dropping to around  $1.37D_{\text{eq}}$  for  $R_1$  (Fig. 3d), where  $D_{\text{eq}}$  is the equilibrium lamellar spacing.

The value of  $\Delta G_{\text{tot}}$  was calculated for the two conformations shown in the inset in Fig. 4b, (1) the transition of a supported rim to a ring of supported drops, and (2) and electrode-spanning, fully formed ring plug compared to a ring of cylindrical plugs.

- 
- [1] E. Schäffer, T. Thurn-Albrecht, T. P. Russell, and U. Steiner, *Nature* **403**, 874 (2000).  
 [2] F. S. Bates and G. H. Fredrickson, *Physics Today* **52**, 32 (1999).  
 [3] S. Alexander, *Journal de Physique* **38**, 983 (1977).  
 [4] P. G. D. Gennes, *Macromolecules* **13**, 1069 (1980).  
 [5] S. P. Gido and E. L. Thomas, *Macromolecules* **30**, 3739 (1997).  
 [6] A. Frischknecht and G. H. Fredrickson, *Macromolecules* **32**, 6831 (1999).  
 [7] G. M. Wilmes, D. a. Durkee, N. P. Balsara, and J. A. Liddle, *Macromolecules* **39**, 2435 (2006).
